# Supplementary material
Source: PubMed Central journal article supplement (PMC3196594)
Supplement: NIHMS315445-supplement-1_si_001.pdf [file NIHMS315445-supplement-1_si_001.pdf]

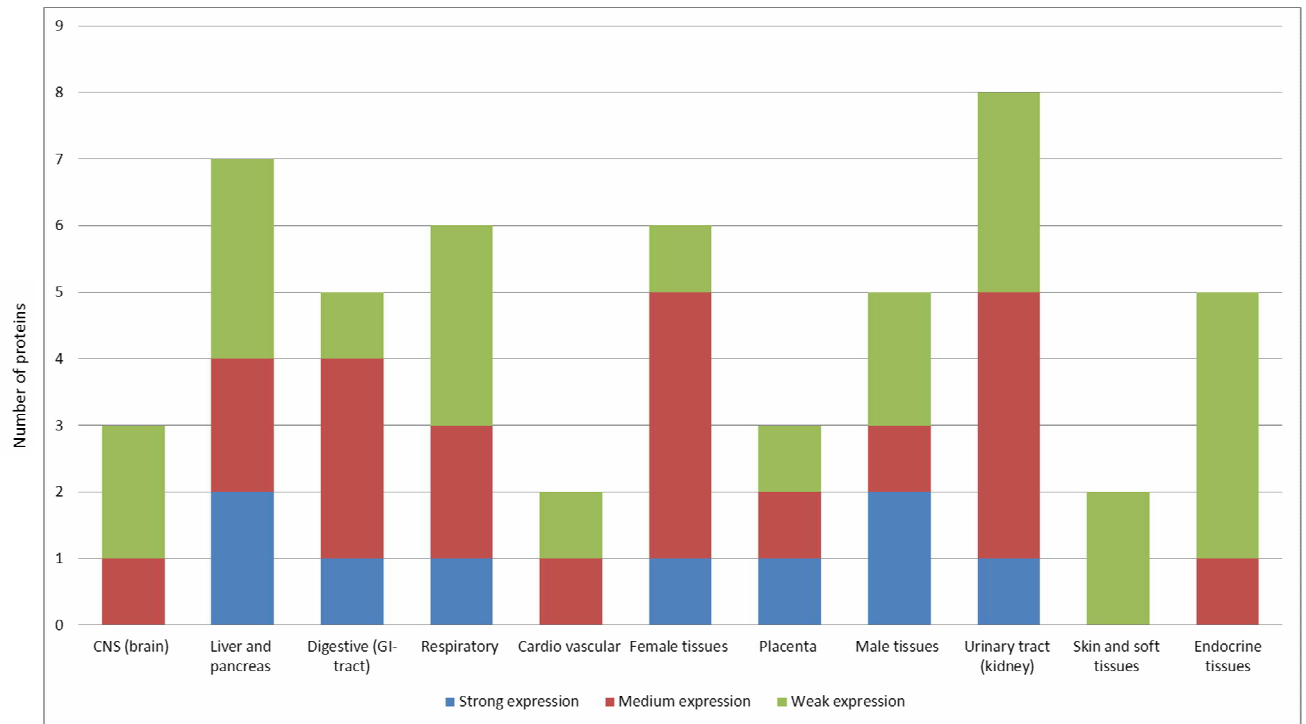

Supporting Figure 1. Annotation of oxidized proteins according to their tissue of origin. Differentially oxidized proteins in the diabetic Zucker rat plasma relative to their lean controls were searched in the protein atlas database and their degree of expression as indicated by the database (low, medium, strong) was plotted against tissue of origin.
